# Supplementary material
Source: Springer Nature journal article supplement (https://www.springermedizin.de/resource/supplementary/13012_2008_133_MOESM2_ESM.pdf/9629328)

Assess

Monitor

Evaluate

**Evidence-Based Innovation**

- understandings/perceptions regarding innovation and knowledge translation process

**Implementing Intervention**

- utilize arts-based approaches for knowledge transfer
- develop adoption strategies

**Outcomes**

- effectiveness of intervention in disseminating innovation and changing practice

**Practice Environment**

- organization
- unit
- health care practitioners
- patients

Determinants of institutional and individual practice

**Identify**

Barriers and supports to innovation

Interconnection between context and practice

**Tailoring Intervention**

- barrier management
- maximizing supports for change

Taken-for-granted assumptions

Properties of Agents

**Critical Reflection by Adopters**

Interconnection between context and practice

Effecting practice change

**Potential Adopters**

- knowledge
- attitudes
- skills

Properties of Agents

**Potential Adopters**

- knowledge
- attitudes
- skills

Properties of Agents

Structural and Agential Emergent Properties

**Adoption**

- action/inaction related to intervention

**Outcomes**

- impact of intervention on practitioners, patients, and organizational outcomes

*Generative Causa / Mechanisms*

*Generative Causa / Mechanisms*

*Generative Causa / Mechanisms*

*Generative Causa / Mechanisms*

Properties of Agents

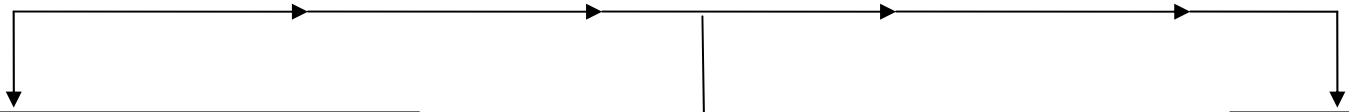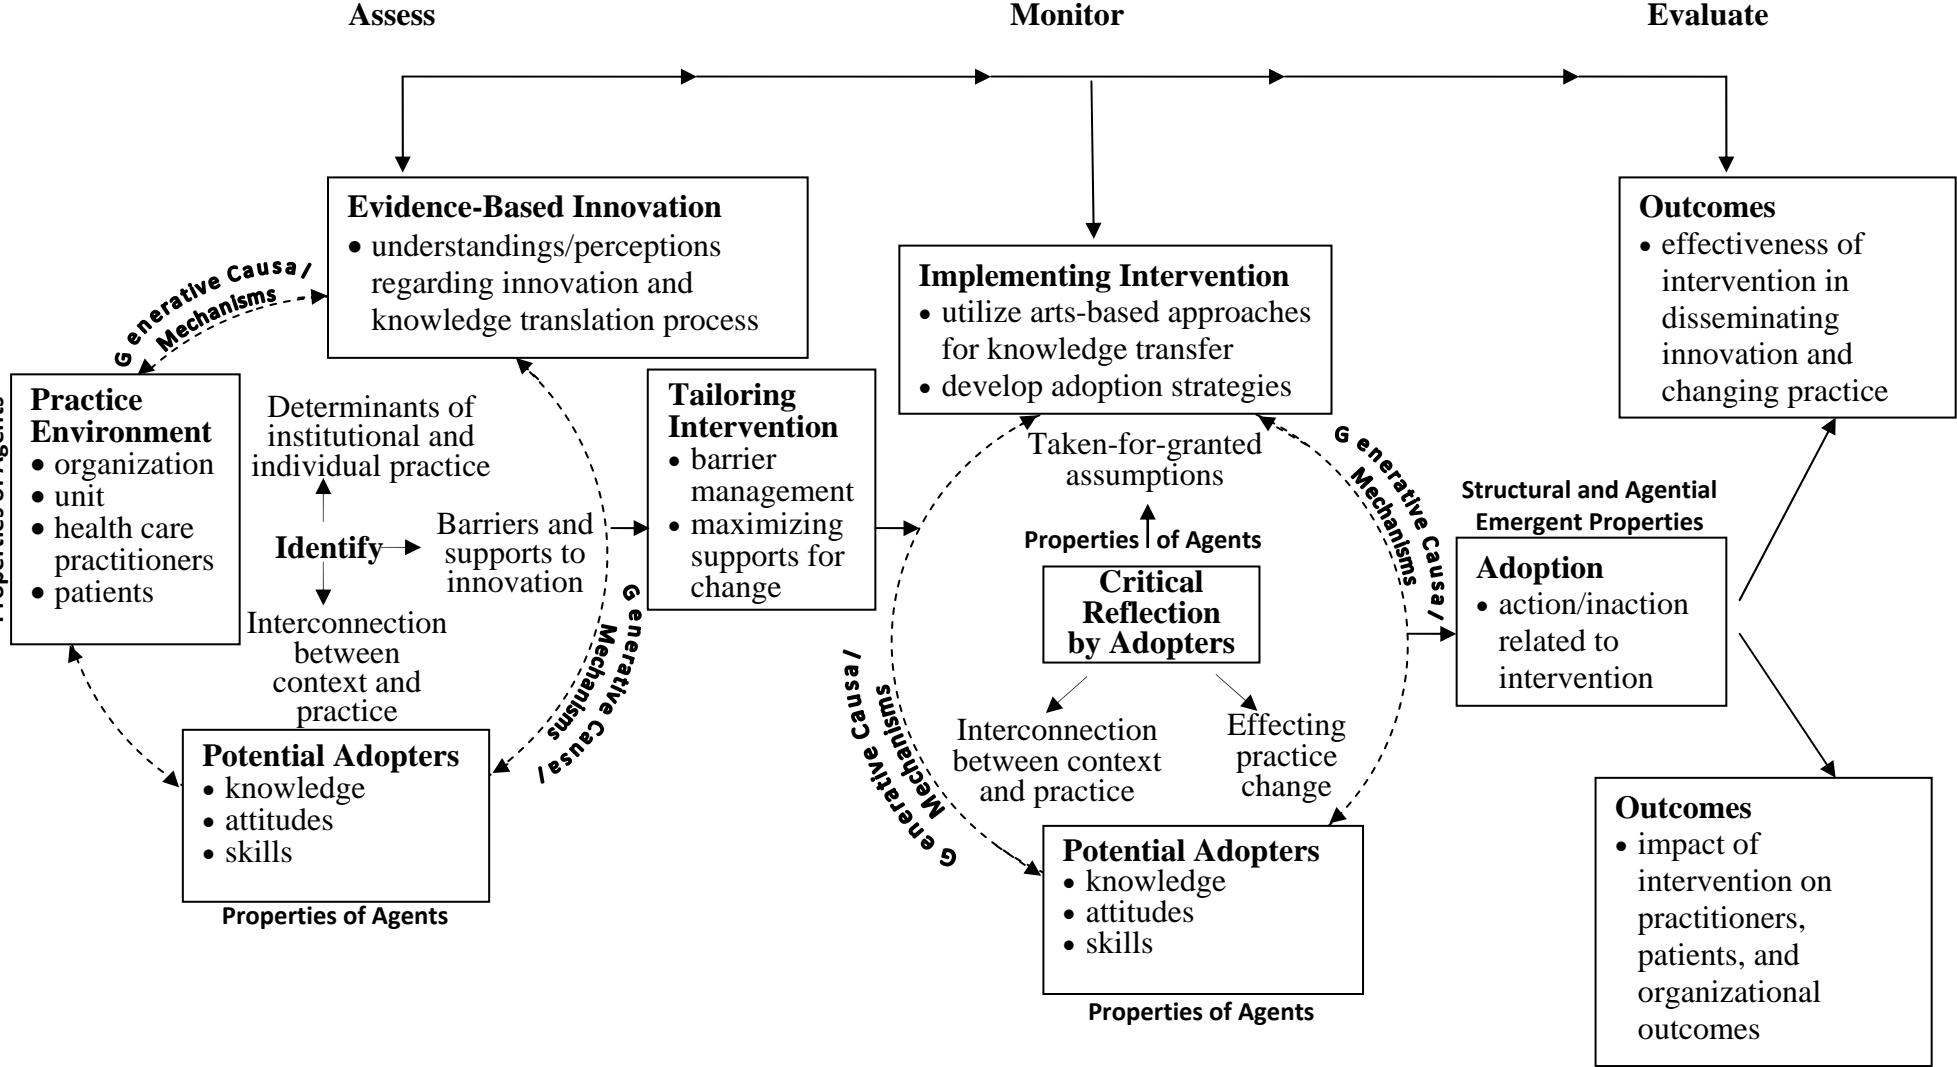

Supplement: MOESM2 [file 9629328]
